# Supplementary material for: Epigenomic analysis of high-grade T1 bladder cancer reveals subtypes with clinical implications that display extensive intra-tumor heterogeneity with spatial features.
Source: Research Square preprint supplement (doi:10.21203/rs.3.rs-5285350/v1), 2024-11-11
Supplement: Supplementary file 1 [file 2288853a5dd6bbff6f0e93fe.xlsx]

## Sheet: Sheet1
luminal	basal
FBN2	BMP7
SLC4A4	ERN2
CTTNBP2	SRPX2
KALRN	UGT1A10
SELL	CLCA2
PMP22	SPOCD1
UGT2B7	SERPINB5
COL12A1	SEMA4B
PTH2R	CLCA4
ANKRD36	CLU
DCDC2	UGT1A7
PRTG	SH3PXD2A
BPGM	AQP3
PDE9A	ANXA10
ANXA3	SLITRK6
