# Supplementary material for: Epigenomic analysis of high-grade T1 bladder cancer reveals subtypes with clinical implications that display extensive intra-tumor heterogeneity with spatial features.
Source: Research Square preprint supplement (doi:10.21203/rs.3.rs-5285350/v1), 2024-11-11
Supplement: Supplementary file 2 [file 80c234c62779bb6a329af95b.xlsx]

## Sheet: Sheet1
Sample	UniqMappedReads(M)	TotalPeaks	FRiP	DHS_%
MP1	57.6	15503	4.4	85.34
MP3	47	40979	7.9	94.1
MP5	50.7	38726	10.7	96.7
MP6	64	56555	36.6	99.3
MP8	56.5	21048	6.4	96.12
MP9	96.2	52180	23.5	99.28
UCC1	36.3	41461	23.8	99.34
UCC10	154.9	29937	13.7	95.32
UCC11	74.4	31915	16	95.82
UCC12	75.5	29122	17.4	97.4
UCC13	152.5	40480	15.9	95.7
UCC3	73.2	10606	3.1	90.42
UCC4	78.3	39672	20.5	98.78
UCC5	80.2	44241	25.6	99.5
UCC7	79.8	53933	29.7	99.66
UCC8	57	53594	33.3	99.36
UCC9	89.7	33869	19.1	96.86
