# Supplementary material for: Epigenomic analysis of high-grade T1 bladder cancer reveals subtypes with clinical implications that display extensive intra-tumor heterogeneity with spatial features.
Source: Research Square preprint supplement (doi:10.21203/rs.3.rs-5285350/v1), 2024-11-11
Supplement: Supplementary file 3 [file beaca743020ce5e876cd6ad3.xlsx]

## Sheet: Sheet1
MP										UCC
Motif Name	Consensus	P-value	Log P-value	q-value (Benjamini)	# of Target Sequences with Motif(of 686)	% of Target Sequences with Motif	# of Background Sequences with Motif(of 49005)	% of Background Sequences with Motif		Motif Name	Consensus	P-value	Log P-value	q-value (Benjamini)	# of Target Sequences with Motif(of 1311)	% of Target Sequences with Motif	# of Background Sequences with Motif(of 48814)	% of Background Sequences with Motif
Jun-AP1(bZIP)/K562-cJun-ChIP-Seq(GSE31477)/Homer	GATGASTCATCN	1e-16	-37.75	0	196	0.2857	7782	0.1588		IRF2(IRF)/Erythroblas-IRF2-ChIP-Seq(GSE36985)/Homer	GAAASYGAAASY	1e-21	-48.59	0	290	0.2212	6140.8	0.1258
GRHL2(CP2)/HBE-GRHL2-ChIP-Seq(GSE46194)/Homer	AAACYKGTTWDACMRGTTTB	0.01	-6.361	0.1297	222	0.3236	13350.6	0.2724		Ets1-distal(ETS)/CD4+-PolII-ChIP-Seq(Barski_et_al.)/Homer	MACAGGAAGT	1e-13	-31.5	0	524	0.3997	14694.3	0.3011
ELF1(ETS)/Jurkat-ELF1-ChIP-Seq(SRA014231)/Homer	AVCCGGAAGT	0.01	-4.822	0.5241	236	0.344	14738.4	0.3007		p73(p53)/Trachea-p73-ChIP-Seq(PRJNA310161)/Homer	NRRRCAWGTCCDGRCATGYY	1e-08	-19.83	0	113	0.0862	2332.2	0.0478
Tcfcp2l1(CP2)/mES-Tcfcp2l1-ChIP-Seq(GSE11431)/Homer	NRAACCRGTTYRAACCRGYT	0.1	-4.403	0.7469	82	0.1195	4562.2	0.0931		RORg(NR)/Liver-Rorc-ChIP-Seq(GSE101115)/Homer	WAABTAGGTCAV	0.001	-7.482	0.0323	188	0.1434	5542.7	0.1136
MafK(bZIP)/C2C12-MafK-ChIP-Seq(GSE36030)/Homer	GCTGASTCAGCA	0.1	-4.247	0.8213	136	0.1983	8128.8	0.1659		E2F(E2F)/Hela-CellCycle-Expression/Homer	TTSGCGCGAAAA	0.01	-4.79	0.4058	50	0.0381	1297.3	0.0266
AT1G10720(BSD)/col-AT1G10720-DAP-Seq(GSE60143)/Homer	TTCTAGAAKCTTCTA	0.1	-4.062	0.9338	26	0.0379	1179.3	0.0241		MYB3R1(MYB)/col-MYB3R1-DAP-Seq(GSE60143)/Homer	WWDTDACCGTTR	0.1	-4.498	0.5174	333	0.254	11072.9	0.2269
UCC-BL										UCC-LLI
Motif Name	Consensus	P-value	Log P-value	q-value (Benjamini)	# of Target Sequences with Motif(of 9871)	% of Target Sequences with Motif	# of Background Sequences with Motif(of 40397)	% of Background Sequences with Motif		Motif Name	Consensus	P-value	Log P-value	q-value (Benjamini)	# of Target Sequences with Motif(of 3727)	% of Target Sequences with Motif	# of Background Sequences with Motif(of 45727)	% of Background Sequences with Motif
Jun-AP1(bZIP)/K562-cJun-ChIP-Seq(GSE31477)/Homer	GATGASTCATCN	1e-231	-533.3	0	3060	0.31	7085.6	0.1754		IRF2(IRF)/Erythroblas-IRF2-ChIP-Seq(GSE36985)/Homer	GAAASYGAAASY	1e-22	-51.64	0	420	0.1127	3127.7	0.0684
p73(p53)/Trachea-p73-ChIP-Seq(PRJNA310161)/Homer	NRRRCAWGTCCDGRCATGYY	1e-129	-297.7	0	871	0.0882	1416.8	0.0351		Ets1-distal(ETS)/CD4+-PolII-ChIP-Seq(Barski_et_al.)/Homer	MACAGGAAGT	1e-07	-18	0	758	0.2034	7701.5	0.1685
Tcfcp2l1(CP2)/mES-Tcfcp2l1-ChIP-Seq(GSE11431)/Homer	NRAACCRGTTYRAACCRGYT	1e-15	-35.85	0	1215	0.1231	3957.4	0.0979		Hnf1(Homeobox)/Liver-Foxa2-Chip-Seq(GSE25694)/Homer	GGTTAAWCATTAA	1e-07	-17.24	0	491	0.1318	4739.2	0.1037
ETS(ETS)/Promoter/Homer	AACCGGAAGT	1e-12	-28.64	0	2107	0.2134	7469	0.1849		NFkB-p65-Rel(RHD)/ThioMac-LPS-Expression(GSE23622)/Homer	GGAAATTCCC	0.0001	-10.67	0.0023	186	0.0499	1674.1	0.0366
AS2(LOBAS2)/col-AS2-DAP-Seq(GSE60143)/Homer	CCGDAAWWHMCGSCG	1e-08	-19.56	0	162	0.0164	405.6	0.01		FAR1(FAR1)/col-FAR1-DAP-Seq(GSE60143)/Homer	TKNNNYYCACGCGCY	0.0001	-9.82	0.0041	172	0.0462	1553.4	0.034
TGA3(bZIP)/colamp-TGA3-DAP-Seq(GSE60143)/Homer	WTGATGACGTCATCW	1e-06	-14.4	0	328	0.0332	1016.2	0.0252		GATA(Zf),IR4/iTreg-Gata3-ChIP-Seq(GSE20898)/Homer	NAGATWNBNATCTNN	0.0001	-9.623	0.0046	243	0.0652	2322.1	0.0508
