# Supplementary material for: Epigenomic analysis of high-grade T1 bladder cancer reveals subtypes with clinical implications that display extensive intra-tumor heterogeneity with spatial features.
Source: Research Square preprint supplement (doi:10.21203/rs.3.rs-5285350/v1), 2024-11-11
Supplement: Supplementary file 4 [file ca32e7dd93fb55c154c323fd.xlsx]

## Sheet: Sheet1
vh1
	B.cells.VEGF	basal.VEGF	double.negative.VEGF	endothelial.cells.VEGF	fibroblasts.VEGF	luminal.VEGF	macrophages.VEGF	Tcells.VEGF	B.cells.IGFBP	basal.IGFBP	double.negative.IGFBP	endothelial.cells.IGFBP	fibroblasts.IGFBP	luminal.IGFBP	macrophages.IGFBP	Tcells.IGFBP	B.cells.ncWNT	basal.ncWNT	double.negative.ncWNT	endothelial.cells.ncWNT	fibroblasts.ncWNT	luminal.ncWNT	macrophages.ncWNT	Tcells.ncWNT	B.cells.SPP1	basal.SPP1	double.negative.SPP1	endothelial.cells.SPP1	fibroblasts.SPP1	luminal.SPP1	macrophages.SPP1	Tcells.SPP1	B.cells.GALECTIN	basal.GALECTIN	double.negative.GALECTIN	endothelial.cells.GALECTIN	fibroblasts.GALECTIN	luminal.GALECTIN	macrophages.GALECTIN	Tcells.GALECTIN	B.cells.COMPLEMENT	basal.COMPLEMENT	double.negative.COMPLEMENT	endothelial.cells.COMPLEMENT	fibroblasts.COMPLEMENT	luminal.COMPLEMENT	macrophages.COMPLEMENT	Tcells.COMPLEMENT	B.cells.MIF
B cells	0	0	0	0.0389003	0	0	0	0	0	0	0	0	0	0	0	0	0	0	0	0	0	0	0	0	0	0	0	0	0	0	0	0	0	0	0	0	0	0	0	0	0	0	0	0	0	0	0	0	0.0177168
basal	0	0	0	0.330731	0	0	0	0	0	0.0259296	0.021442	0.0236975	0.0252759	0.0155563	0	0	0	0	0	0.190402	0	0	0	0	0	0.0471293	0	0.01607	0.0139182	0	0	0	0	0	0	0	0	0	0	0	0	0	0	0	0	0	0	0	0
double negative	0	0	0	0.362795	0	0	0	0	0	0.0147966	0	0	0	0	0	0	0	0	0	0.191053	0	0	0	0	0	0.0475344	0	0.0162127	0.014042	0	0	0	0	0	0	0	0	0	0	0	0	0	0	0	0	0	0	0	0
endothelial cells	0	0	0	0	0	0	0	0	0	0.0792253	0.0661402	0.072748	0.0773347	0.0485943	0	0	0	0	0	0	0	0	0	0	0	0	0	0.0139916	0.0121147	0	0	0	0	0	0	0	0	0	0	0	0	0	0	0	0	0	0	0	0
fibroblasts	0	0	0	0	0	0	0	0	0	0	0	0	0	0	0	0	0	0	0	0.012956	0	0	0	0	0	0	0	0	0	0	0	0	0	0	0	0	0	0	0	0	0	0	0	0	0	0	0.0190668	0	0
luminal	0	0	0	0.394274	0	0	0	0	0	0.0391474	0.0324484	0.0358193	0	0.0236144	0	0	0	0	0	0.194719	0	0	0	0	0	0.0504294	0	0.0172346	0.0149292	0	0	0	0	0	0	0	0	0	0	0	0	0	0	0	0	0	0	0	0
macrophages	0	0	0	0	0	0	0	0	0	0	0	0	0	0	0	0	0	0	0	0	0	0	0	0	0	0.0492035	0	0.0168013	0.0145531	0	0	0	0.0415335	0.0411817	0.0354497	0.0234039	0.00247839	0.0153492	0.011117	0.0173975	0	0	0	0	0	0	0.0618654	0	0
Tcells	0	0	0	0	0	0	0	0	0	0	0	0	0	0	0	0	0	0	0	0	0	0	0	0	0	0	0	0	0	0	0	0	0	0	0	0	0	0	0	0	0	0	0	0	0	0	0	0	0
vh12
	B.cells.VEGF	basal.VEGF	double.negative.VEGF	endothelial.cells.VEGF	fibroblasts.VEGF	luminal.VEGF	macrophages.VEGF	Tcells.VEGF	B.cells.IGFBP	basal.IGFBP	double.negative.IGFBP	endothelial.cells.IGFBP	fibroblasts.IGFBP	luminal.IGFBP	macrophages.IGFBP	Tcells.IGFBP	B.cells.SLITRK	basal.SLITRK	double.negative.SLITRK	endothelial.cells.SLITRK	fibroblasts.SLITRK	luminal.SLITRK	macrophages.SLITRK	Tcells.SLITRK	B.cells.ncWNT	basal.ncWNT	double.negative.ncWNT	endothelial.cells.ncWNT	fibroblasts.ncWNT	luminal.ncWNT	macrophages.ncWNT	Tcells.ncWNT	B.cells.GALECTIN	basal.GALECTIN	double.negative.GALECTIN	endothelial.cells.GALECTIN	fibroblasts.GALECTIN	luminal.GALECTIN	macrophages.GALECTIN	Tcells.GALECTIN	B.cells.APRIL	basal.APRIL	double.negative.APRIL	endothelial.cells.APRIL	fibroblasts.APRIL	luminal.APRIL	macrophages.APRIL	Tcells.APRIL	B.cells.PDGF
B cells	0	0	0	0	0	0	0	0	0	0	0	0	0	0	0	0	0	0	0	0	0	0	0	0	0	0	0	0	0	0	0	0	0	0	0	0	0	0	0	0	0	0	0	0	0	0	0	0	0
basal	0	0	0	0.0570612	0	0	0	0	0	0	0.0176891	0	0	0.0180013	0	0	0	0.0110573	0.0132459	0.00978523	0.0173426	0.0150656	0	0	0	0	0	0.0564223	0	0	0	0	0	0	0	0	0	0	0	0	0	0	0	0	0	0	0	0	0
double negative	0	0	0	0.056862	0	0	0	0	0	0	0	0	0	0	0	0	0	0	0	0	0	0	0	0	0	0	0	0	0	0	0	0	0	0	0	0	0	0	0	0	0	0	0	0	0	0	0	0	0
endothelial cells	0	0	0	0	0	0	0	0	0	0.0548613	0.0572349	0.0285291	0	0.0582038	0.0513698	0	0	0	0	0	0	0	0	0	0	0	0	0	0	0	0	0	0	0	0	0	0	0	0	0	0	0	0	0	0	0	0	0	0
fibroblasts	0	0	0	0.046936	0	0	0	0	0	0	0	0	0	0	0	0	0	0	0	0	0	0	0	0	0	0	0	0	0	0	0	0	0	0	0	0	0	0	0	0	0	0	0	0	0	0	0	0	0
luminal	0	0	0	0.0560506	0	0	0	0	0	0	0	0	0	0	0	0	0	0	0	0	0	0	0	0	0	0	0	0	0	0	0	0	0	0	0	0	0	0	0	0	0	0	0	0	0	0	0	0	0
macrophages	0	0	0	0.0404962	0	0	0	0	0	0	0	0	0	0	0	0	0	0	0	0	0	0	0	0	0	0	0	0	0	0	0	0	0.0133067	0	0	0.00633307	0	0	0	0.0132441	0.00871673	0	0	0	0	0	0	0	0
Tcells	0	0	0	0.0542863	0	0	0	0	0	0	0	0	0	0	0	0	0	0	0	0	0	0	0	0	0	0	0	0	0	0	0	0	0	0	0	0	0	0	0	0	0	0	0	0	0	0	0	0	0
vh15
	B.cells.VEGF	basal.VEGF	double.negative.VEGF	endothelial.cells.VEGF	fibroblasts.VEGF	luminal.VEGF	macrophages.VEGF	B.cells.SEMA3	basal.SEMA3	double.negative.SEMA3	endothelial.cells.SEMA3	fibroblasts.SEMA3	luminal.SEMA3	macrophages.SEMA3	B.cells.IGFBP	basal.IGFBP	double.negative.IGFBP	endothelial.cells.IGFBP	fibroblasts.IGFBP	luminal.IGFBP	macrophages.IGFBP	B.cells.PDGF	basal.PDGF	double.negative.PDGF	endothelial.cells.PDGF	fibroblasts.PDGF	luminal.PDGF	macrophages.PDGF
B cells	0	0	0	0	0	0	0	0	0	0	0	0	0	0	0	0	0	0	0	0	0	0	0	0	0	0	0	0
basal	0	0	0	0.0587756	0	0	0	0	0	0	0	0	0	0	0	0	0	0	0	0	0	0	0	0	0	0	0	0
double negative	0	0	0	0.0592402	0	0	0	0	0	0	0	0	0	0	0	0	0	0	0	0	0	0	0	0	0	0	0	0
endothelial cells	0	0	0	0	0	0	0	0	0	0	0	0	0	0	0	0	0	0	0	0	0	0	0	0	0.00346448	0.00195302	0	0
fibroblasts	0	0	0	0.0540378	0	0	0	0	0	0	0	0	0	0	0	0	0	0	0	0	0	0	0	0	0	0	0	0
luminal	0	0	0	0.176607	0	0	0	0	0	0	0.048877	0	0	0	0	0	0.0131915	0	0	0.0151781	0	0	0	0	0	0	0	0
macrophages	0	0	0	0	0	0	0	0	0	0	0	0	0	0	0	0	0	0	0	0	0	0	0	0	0	0	0	0
vh24
NA
vh61
NA
vh75
	B.cells.VEGF	basal.VEGF	double.negative.VEGF	endothelial.cells.VEGF	fibroblasts.VEGF	luminal.VEGF	macrophages.VEGF	Tcells.VEGF	B.cells.MK	basal.MK	double.negative.MK	endothelial.cells.MK	fibroblasts.MK	luminal.MK	macrophages.MK	Tcells.MK	B.cells.GALECTIN	basal.GALECTIN	double.negative.GALECTIN	endothelial.cells.GALECTIN	fibroblasts.GALECTIN	luminal.GALECTIN	macrophages.GALECTIN	Tcells.GALECTIN	B.cells.MIF	basal.MIF	double.negative.MIF	endothelial.cells.MIF	fibroblasts.MIF	luminal.MIF	macrophages.MIF	Tcells.MIF	B.cells.ANGPTL	basal.ANGPTL	double.negative.ANGPTL	endothelial.cells.ANGPTL	fibroblasts.ANGPTL	luminal.ANGPTL	macrophages.ANGPTL	Tcells.ANGPTL	B.cells.COMPLEMENT	basal.COMPLEMENT	double.negative.COMPLEMENT	endothelial.cells.COMPLEMENT	fibroblasts.COMPLEMENT	luminal.COMPLEMENT	macrophages.COMPLEMENT	Tcells.COMPLEMENT	B.cells.SEMA3
B cells	0	0	0	0	0	0	0	0	0	0	0	0	0	0	0	0	0	0	0	0	0	0	0	0	0	0.0129113	0.00826	0	0	0.0129644	0.0138104	0.0163648	0	0	0	0	0	0	0	0	0	0	0	0	0	0	0	0	0
basal	0	0	0	0.559407	0	0	0	0	0.0298846	0.0377695	0.0317654	0	0.0121741	0.047772	0.00877615	0	0	0	0	0	0	0	0	0	0	0.00966015	0.00617274	0	0	0.00970003	0.0103352	0.0122548	0	0	0	0	0	0	0	0	0	0	0	0	0	0	0	0	0
double negative	0	0	0	0.519542	0	0	0	0	0.0288936	0.0365105	0.0307029	0	0.0117633	0.0461802	0.00847901	0	0	0	0	0	0	0	0	0	0	0	0	0	0	0	0	0	0	0	0	0	0	0	0	0	0	0	0	0	0	0	0	0	0
endothelial cells	0	0	0	0	0	0	0	0	0.0151048	0.0190394	0.0159852	0	0.00609822	0.0240862	0.00438858	0	0	0	0	0	0	0	0	0	0	0	0	0	0	0	0	0	0	0	0	0	0	0	0	0	0	0	0	0	0	0	0	0	0
fibroblasts	0	0	0	0.177148	0	0	0	0	0	0	0	0	0	0	0	0	0	0	0	0	0	0	0	0	0	0	0	0	0	0	0	0	0	0	0	0	0	0	0	0	0	0	0	0	0	0	0.109972	0	0
luminal	0	0	0	0.544833	0	0	0	0	0.0757767	0.0965947	0.0816749	0	0.0317596	0.122082	0.0230224	0	0.00730626	0.0257794	0.015286	0.00539561	0	0.0338039	0.00924002	0.0239013	0	0.00808709	0.00516461	0	0	0.00812052	0.0086532	0.0102636	0.0162756	0.0205193	0.0172301	0.0220197	0.00546871	0.0259581	0.00469772	0	0	0	0	0	0	0	0	0	0
macrophages	0	0	0	0	0	0	0	0	0	0	0	0	0	0	0	0	0.00719588	0.0253933	0.0150551	0.00531393	0	0.0332982	0.00910069	0.0235461	0	0	0	0	0	0	0	0	0	0	0	0	0	0	0	0	0	0	0	0	0	0	0	0	0
Tcells	0	0	0	0	0	0	0	0	0	0	0	0	0	0	0	0	0	0	0	0	0	0	0	0	0	0	0	0	0	0	0	0	0	0	0	0	0	0	0	0	0	0	0	0	0	0	0	0	0
vh122
	B.cells.VEGF	basal.VEGF	double.negative.VEGF	endothelial.cells.VEGF	fibroblasts.VEGF	luminal.VEGF	macrophages.VEGF	Tcells.VEGF	B.cells.IGFBP	basal.IGFBP	double.negative.IGFBP	endothelial.cells.IGFBP	fibroblasts.IGFBP	luminal.IGFBP	macrophages.IGFBP	Tcells.IGFBP	B.cells.COMPLEMENT	basal.COMPLEMENT	double.negative.COMPLEMENT	endothelial.cells.COMPLEMENT	fibroblasts.COMPLEMENT	luminal.COMPLEMENT	macrophages.COMPLEMENT	Tcells.COMPLEMENT	B.cells.SLITRK	basal.SLITRK	double.negative.SLITRK	endothelial.cells.SLITRK	fibroblasts.SLITRK	luminal.SLITRK	macrophages.SLITRK	Tcells.SLITRK	B.cells.PDGF	basal.PDGF	double.negative.PDGF	endothelial.cells.PDGF	fibroblasts.PDGF	luminal.PDGF	macrophages.PDGF	Tcells.PDGF
B cells	0	0	0	0	0	0	0	0	0	0	0	0	0	0	0	0	0	0	0	0	0	0	0	0	0	0	0	0	0	0	0	0	0	0	0	0	0	0	0	0
basal	0	0	0	0.0376049	0	0	0	0	0	0	0	0	0	0	0	0	0	0	0	0	0	0	0	0	0	0.0146855	0.0143556	0.00702249	0.013641	0.0139509	0	0	0	0	0	0	0	0	0	0
double negative	0	0	0	0.0347666	0	0	0	0	0	0.00550517	0.00545485	0	0	0	0	0	0	0	0	0	0	0	0	0	0	0	0	0	0	0	0	0	0	0	0	0	0	0	0	0
endothelial cells	0	0	0	0	0	0	0	0	0	0.0134815	0.0133592	0	0	0.0130818	0	0	0	0	0	0	0	0	0	0	0	0	0	0	0	0	0	0	0	0	0	0.00191409	0.00058728	0	0	0
fibroblasts	0	0	0	0.0242785	0	0	0	0	0	0	0	0	0	0	0	0	0	0	0	0	0	0	0.0658784	0	0	0	0	0	0	0	0	0	0	0	0	0	0	0	0	0
luminal	0	0	0	0.0634331	0	0	0	0	0	0.0120166	0.0119074	0.00749604	0	0.0116599	0	0	0	0	0	0	0	0	0	0	0	0	0	0	0	0	0	0	0	0	0	0	0	0	0	0
macrophages	0	0	0	0	0	0	0	0	0	0	0	0	0	0	0	0	0	0	0	0	0	0	0	0	0	0	0	0	0	0	0	0	0	0	0	0	0	0	0	0
Tcells	0	0	0	0.03077	0	0	0	0	0	0	0	0	0	0	0	0	0	0	0	0	0	0	0	0	0	0	0	0	0	0	0	0	0	0	0	0	0	0	0	0
vh125
	B.cells.MK	basal.MK	double.negative.MK	endothelial.cells.MK	fibroblasts.MK	luminal.MK	macrophages.MK	Tcells.MK	B.cells.VEGF	basal.VEGF	double.negative.VEGF	endothelial.cells.VEGF	fibroblasts.VEGF	luminal.VEGF	macrophages.VEGF	Tcells.VEGF	B.cells.GDF	basal.GDF	double.negative.GDF	endothelial.cells.GDF	fibroblasts.GDF	luminal.GDF	macrophages.GDF	Tcells.GDF	B.cells.ncWNT	basal.ncWNT	double.negative.ncWNT	endothelial.cells.ncWNT	fibroblasts.ncWNT	luminal.ncWNT	macrophages.ncWNT	Tcells.ncWNT	B.cells.SLITRK	basal.SLITRK	double.negative.SLITRK	endothelial.cells.SLITRK	fibroblasts.SLITRK	luminal.SLITRK	macrophages.SLITRK	Tcells.SLITRK	B.cells.IL16	basal.IL16	double.negative.IL16	endothelial.cells.IL16	fibroblasts.IL16	luminal.IL16	macrophages.IL16	Tcells.IL16	B.cells.PDGF
B cells	0	0	0	0	0	0	0	0	0	0	0	0	0	0	0	0	0	0	0	0	0	0	0	0	0	0	0	0	0	0	0	0	0	0	0	0	0	0	0	0	0	0	0	0	0	0	0	0	0
basal	0	0.0832021	0.0794123	0.0101072	0.038498	0.0822656	0.00907721	0	0	0	0	0.0327781	0	0	0	0	0	0	0	0	0	0	0	0	0	0	0	0	0	0	0	0	0	0.0133101	0.01209	0	0	0.0106766	0	0	0	0	0	0	0	0	0	0	0
double negative	0	0.0778044	0.0742509	0.00942991	0.0359875	0.0769246	0.00846837	0	0	0	0	0.0343285	0	0	0	0	0	0	0	0	0	0	0	0	0	0	0	0	0	0	0	0	0	0.0103445	0.00939368	0	0	0	0	0	0	0	0	0	0	0	0	0	0
endothelial cells	0	0	0	0	0	0	0	0	0	0	0	0.00457851	0	0	0	0	0	0	0	0	0	0	0	0	0	0	0	0	0	0	0	0	0	0	0	0	0	0	0	0	0	0	0	0	0	0	0	0	0
fibroblasts	0	0	0	0	0	0	0	0	0	0	0	0	0	0	0	0	0	0	0	0.0134211	0.00955093	0	0.0122141	0	0	0.0145808	0.0133022	0.0206763	0	0.00948697	0	0	0	0	0	0	0	0	0	0	0	0	0	0	0	0	0	0	0
luminal	0	0.0748328	0.0272572	0.00905836	0.0346061	0.0289967	0.00813439	0	0	0	0	0.0846412	0	0	0	0	0	0	0	0.00876379	0.00622817	0	0.00797224	0	0	0	0	0	0	0	0	0	0	0	0	0	0	0	0	0	0	0	0	0	0	0	0	0	0
macrophages	0	0	0	0	0	0	0	0	0	0	0	0	0	0	0	0	0	0	0	0	0	0	0	0	0	0	0	0	0	0	0	0	0	0	0	0	0	0	0	0	0	0	0	0	0	0	0	0	0
Tcells	0	0	0	0	0	0	0	0	0	0	0	0	0	0	0	0	0	0	0	0	0	0	0	0	0	0	0	0	0	0	0	0	0	0	0	0	0	0	0	0	0	0	0	0	0	0	0.0224098	0.0200719	0
vh176
	B.cells.IGFBP	basal.IGFBP	double.negative.IGFBP	endothelial.cells.IGFBP	fibroblasts.IGFBP	luminal.IGFBP	macrophages.IGFBP	Tcells.IGFBP	B.cells.VEGF	basal.VEGF	double.negative.VEGF	endothelial.cells.VEGF	fibroblasts.VEGF	luminal.VEGF	macrophages.VEGF	Tcells.VEGF
B cells	0	0	0	0	0	0	0	0	0	0	0	0	0	0	0	0
basal	0	0.0122053	0	0	0	0	0	0	0	0	0	0.0182758	0	0	0	0
double negative	0	0.0122353	0	0	0	0	0	0	0	0	0	0.0194772	0	0	0	0
endothelial cells	0	0.0274331	0	0.0372695	0	0	0	0	0	0	0	0	0	0	0	0
fibroblasts	0	0	0	0	0	0	0	0	0	0	0	0.0144458	0	0	0	0
luminal	0	0.012446	0	0	0	0	0	0	0	0	0	0.0196029	0	0	0	0
macrophages	0	0	0	0	0	0	0	0	0	0	0	0	0	0	0	0
Tcells	0	0	0	0	0	0	0	0	0	0	0	0	0	0	0	0
[truncated: 79 more columns]
